# Supplementary material for: Autophagy Induction by Trichodermic Acid Attenuates Endoplasmic Reticulum Stress-Mediated Apoptosis in Colon Cancer Cells
Source: MDPI journal article supplement (doi:10.3390/ijms22115566), 2021-05-25
Supplement: s1 [file s1]

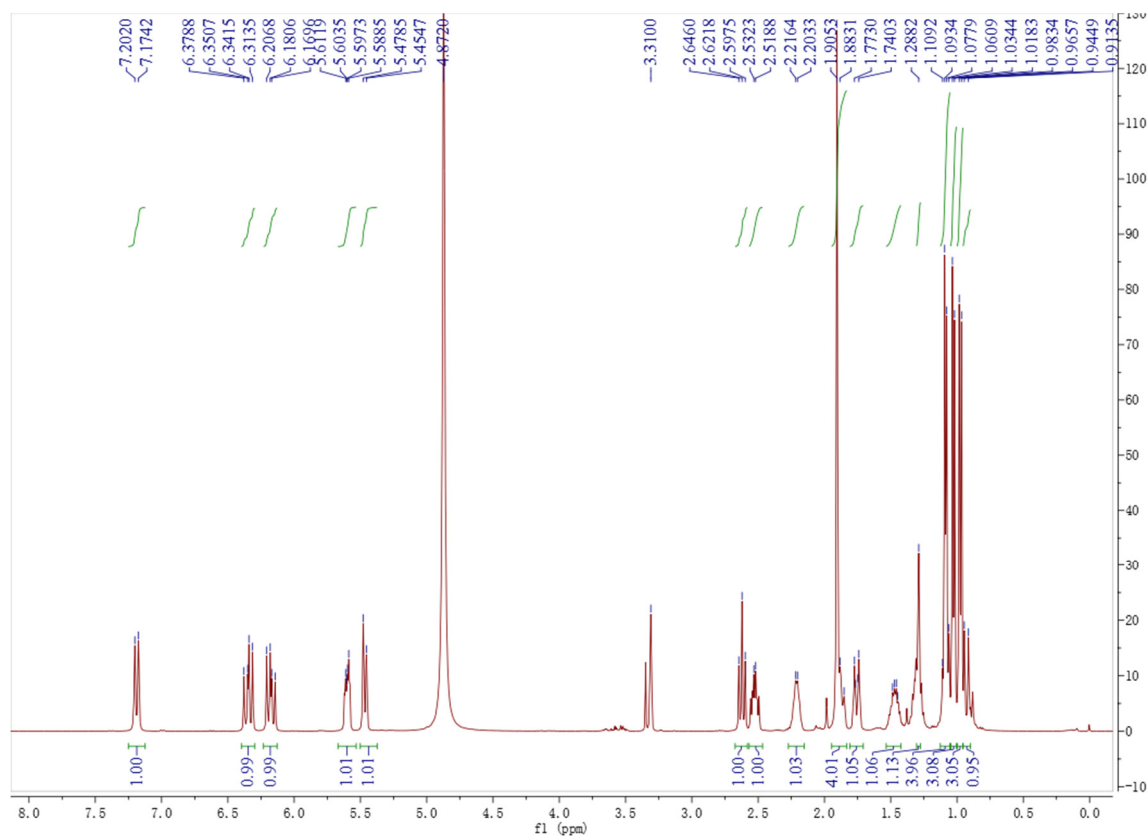

Figure S1.  $^1\text{H}$  NMR spectrum of trichodermic acid ( $\text{CD}_3\text{OD}$ , 400 MHz).

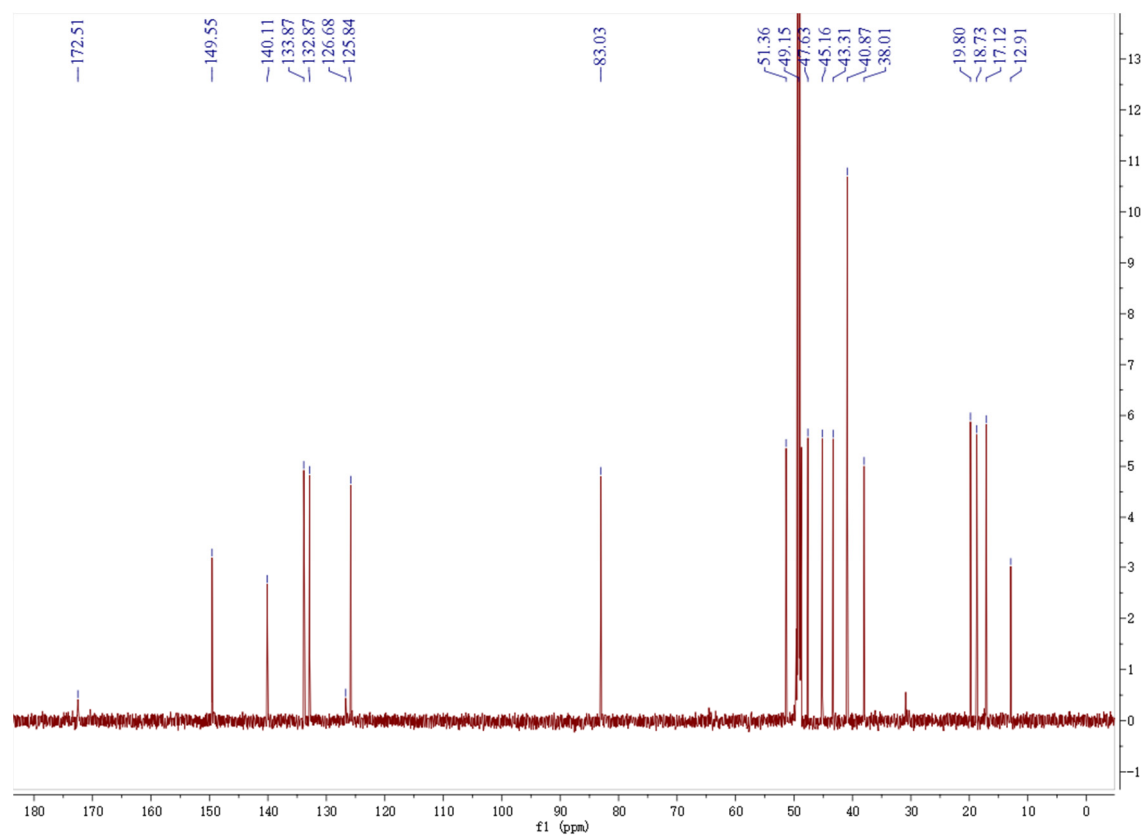

Figure S2.  $^{13}\text{C}$  NMR spectrum of trichodermic acid ( $\text{CD}_3\text{OD}$ , 100 MHz).

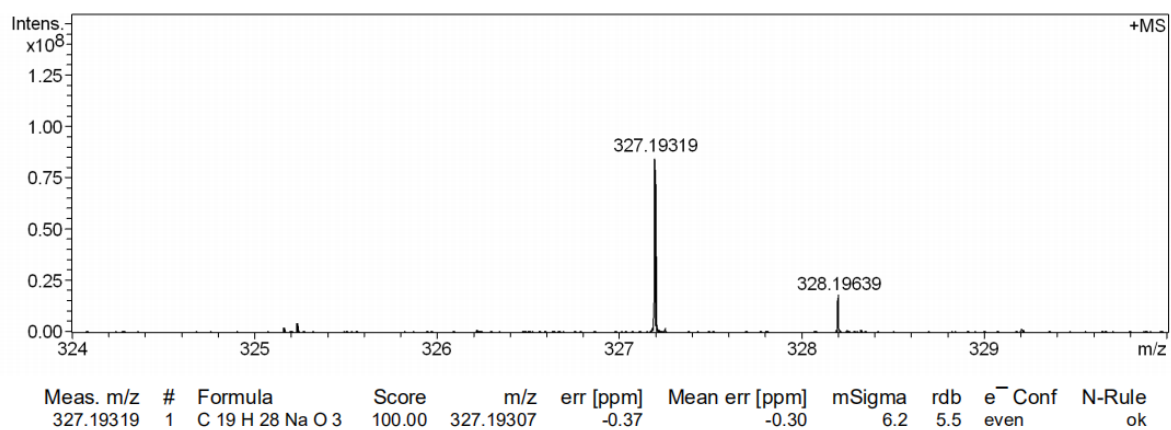

**Figure S3.** HRESIMS spectrum of trichodermic acid.

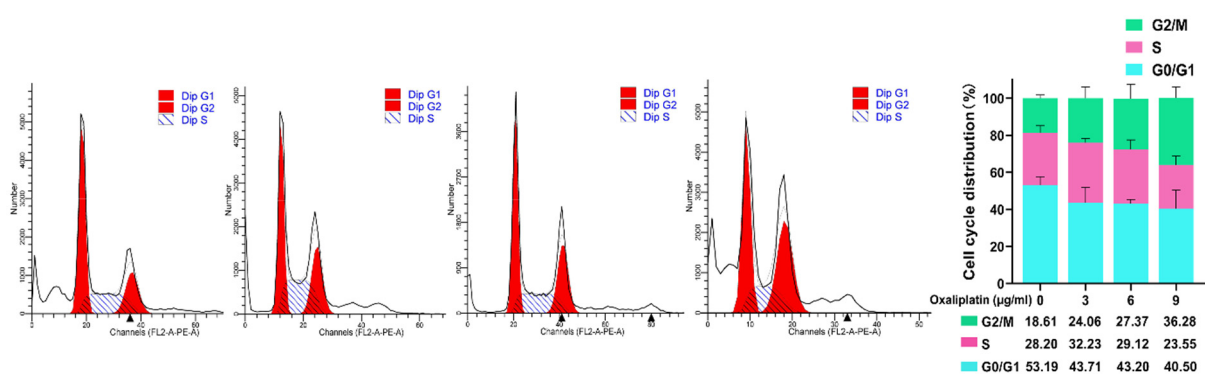

**Figure S4.** Flow cytometric analysis of cell cycle in HCT116 cells upon oxaliplatin treatment as indicated concentration for 24h was performed.
